# Supplementary material for: Automatic Grading of Individual Knee Osteoarthritis Features in Plain Radiographs Using Deep Convolutional Neural Networks
Source: PubMed Central journal article supplement (PMC7697270; doi:10.3390/diagnostics10110932), 2020-11-10
Supplement: diagnostics-10-00932-s001.pdf [file diagnostics-10-00932-s001.pdf]

# Automatic Grading of Individual Knee Osteoarthritis Features in Plain Radiographs using Deep Convolutional Neural Networks

Aleksei Tiulpin<sup>1,2,3,\*</sup> and Simo Saarakkala<sup>1,2</sup>

<sup>1</sup>Research Unit of Medical Imaging, Physics and Technology, University of Oulu, Oulu, Finland.

<sup>2</sup>Department of Diagnostic Radiology, Oulu University Hospital, Oulu, Finland

<sup>3</sup>Ailean Technologies Oy, Oulu, Finland

\*aleksei.tiulpin@oulu.fi

## Supplementary data

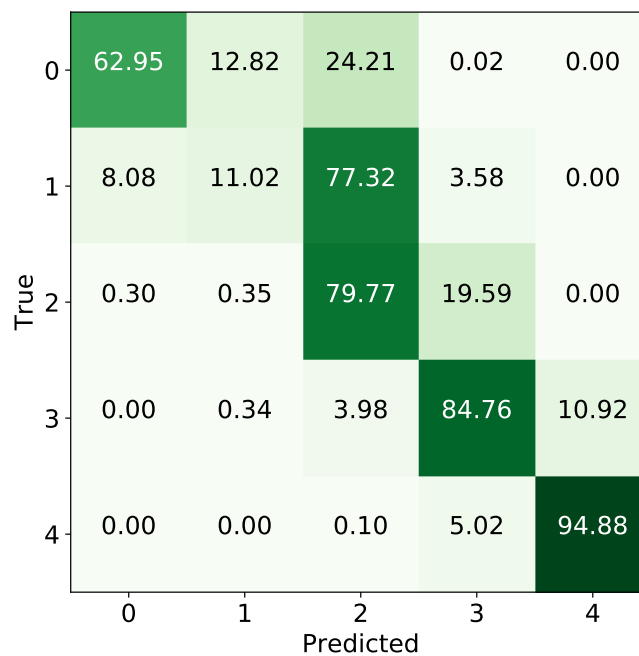

**Figure S1.** Confusion matrix for Kellgren-Lawrence (KL) grading. The numbers indicate percentages.

**Table S1.** Cross-validation results (out of fold): balanced accuracy (%) for each of the trained tasks on out-of-fold sample (OAI dataset). Best results task-wise are highlighted in bold. We selected two best models for through evaluation: SE-Resnet-50<sup>†</sup> and SE-ResNext50-32x4d<sup>‡</sup>. We trained these models from scratch (\*) and also with transfer learning, but w/o the KL-grade (\*\*). Finally, in the last row, we demonstrate the results for the ensembling of these models. L and M indicate lateral and medial compartments, FO and TO indicate femoral and tibial osteophytes and JSN indicates joint space narrowing, respectively. KL indicates the Kellgren-Lawrence grade.

| Backbone                        | KL           | FO           |              | TO           |              | JSN          |              |
|---------------------------------|--------------|--------------|--------------|--------------|--------------|--------------|--------------|
|                                 |              | L            | M            | L            | M            | L            | M            |
| Resnet-18                       | 67.32        | 53.19        | 61.08        | 60.37        | 62.38        | 75.74        | 77.92        |
| Resnet-34                       | 66.93        | 50.91        | 60.11        | 61.86        | 62.13        | 73.66        | 79.09        |
| Resnet-50                       | 66.99        | 52.35        | 62.57        | 61.93        | 64.40        | 73.42        | 78.95        |
| SE-Resnet-50 <sup>†</sup>       | 67.77        | 53.96        | 62.54        | 63.22        | 65.24        | 76.13        | 78.22        |
| SE-ResNext50-32x4d <sup>‡</sup> | 67.08        | 55.37        | 63.31        | 64.55        | 65.14        | 75.05        | 78.65        |
| SE-Resnet-50*                   | 65.07        | 48.58        | 54.64        | 56.14        | 56.44        | 75.86        | 78.56        |
| SE-ResNext50-32x4d*             | 64.31        | 49.25        | 55.11        | 56.04        | 56.76        | 75.58        | 78.89        |
| SE-Resnet-50**                  | -            | 54.97        | 63.28        | 64.00        | 64.17        | 73.39        | <b>79.65</b> |
| SE-ResNext50-32x4d**            | -            | <b>55.40</b> | 63.84        | <b>66.26</b> | 65.00        | <b>74.81</b> | 78.90        |
| Ensemble <sup>†‡</sup>          | <b>68.01</b> | 55.15        | <b>63.86</b> | 64.83        | <b>65.70</b> | <b>76.73</b> | 79.03        |

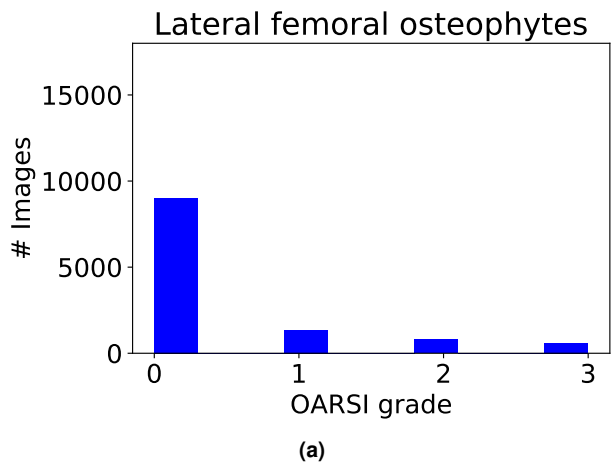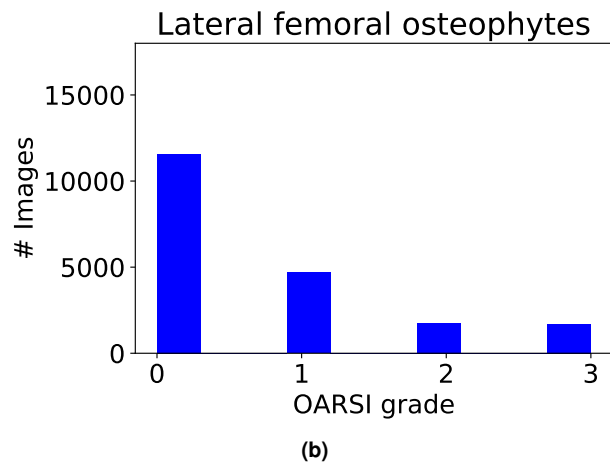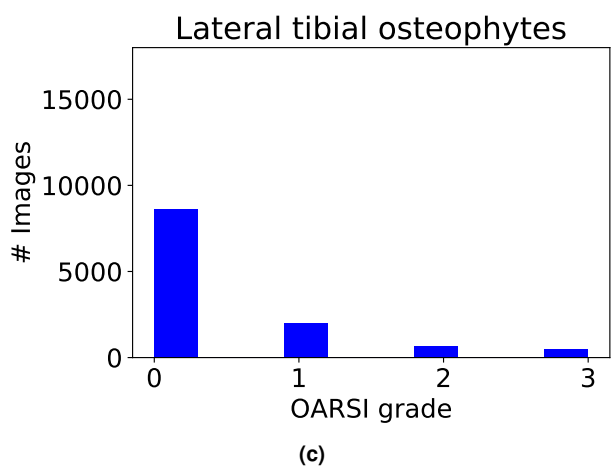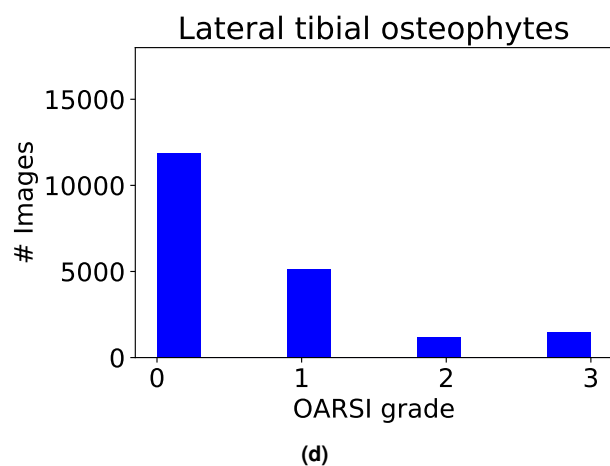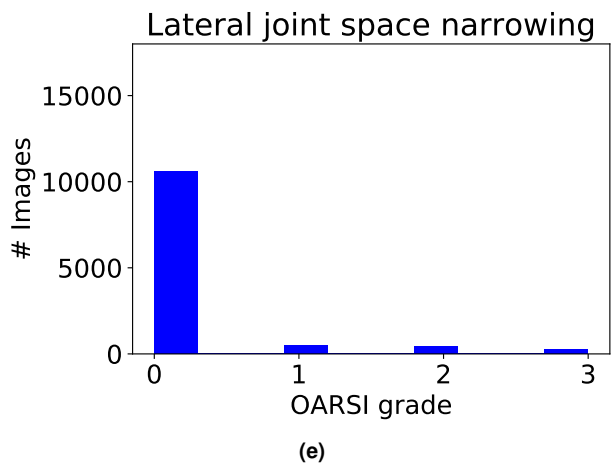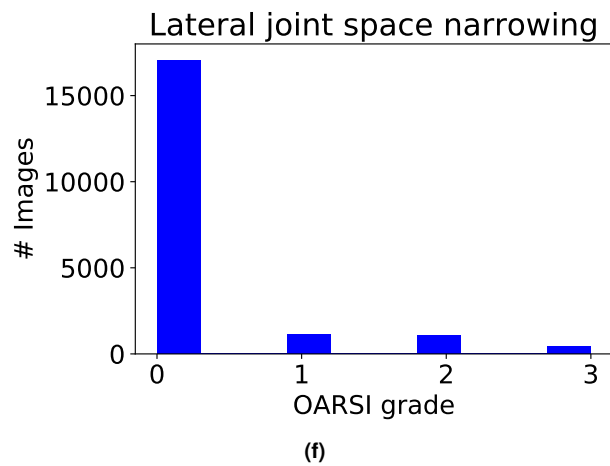

**Figure S2.** Visual representation of lateral OARSI grades distributions in MOST (S2a, S2c, S2e) and OAI (S2b, S2d, S2f) datasets.

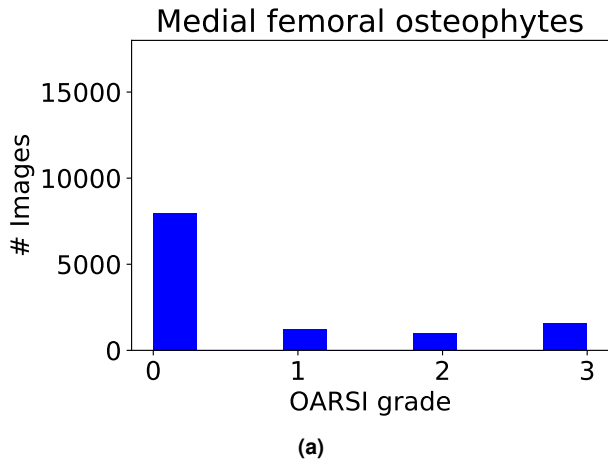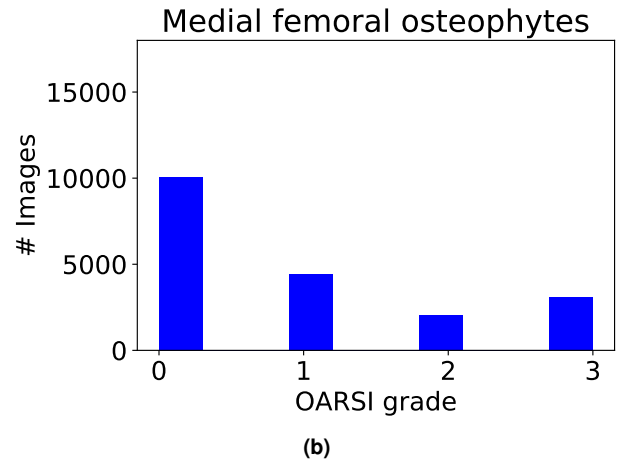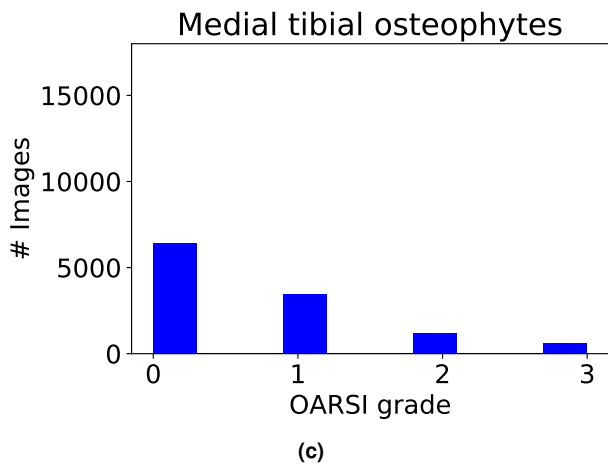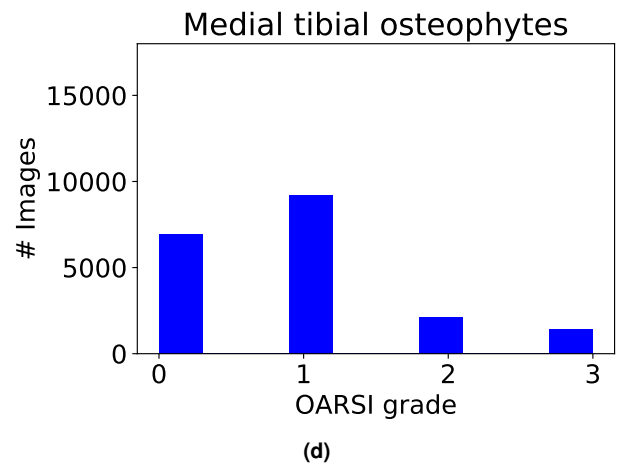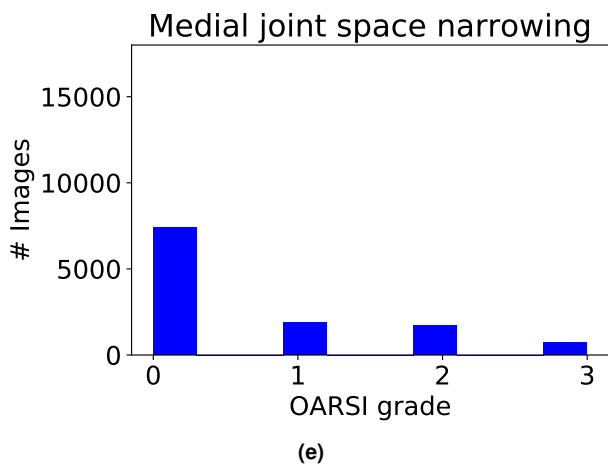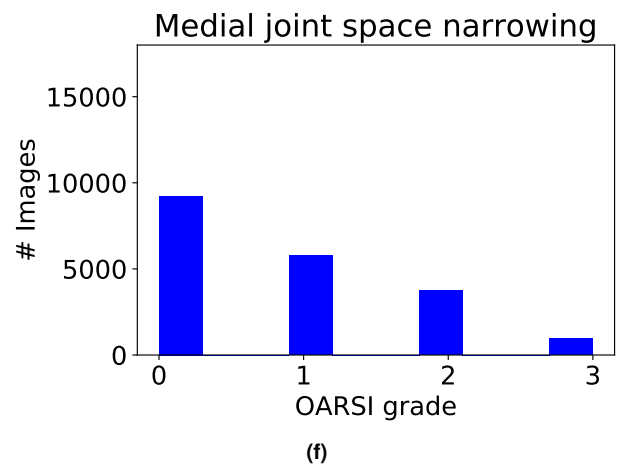

**Figure S3.** Visual representation of lateral OARSI grades distributions in MOST (S3a, S3c, S3e) and OAI (S3b, S3d, S3f) datasets.
